# Supplementary material for: The synthesis of porous graphitic carbon nitride with N3C nitrogen vacancies by a CaCO3 template for improved photocatalytic H2 evolution
Source: Royal Society of Chemistry journal article supplement (doi:10.1039/d2nj02770d), 2022-01-01
Supplement: d2nj02770d1.pdf [file d2nj02770d1.pdf]

Electronic Supplementary Material (ESI) for New Journal of Chemistry.

## Synthesis of Porous Graphitic Carbon Nitride with N<sub>3C</sub> Nitrogen Vacancy by CaCO<sub>3</sub> Template for Improved Photocatalytic H<sub>2</sub> Evolution

Xiaohang Yang,<sup>\*a</sup> Xinzhe Wang,<sup>b</sup> Jiaming Yang,<sup>b</sup> Xingbo Bian,<sup>a</sup> Xueli Yu,<sup>b</sup> Xuyang Huo,<sup>a</sup> Qiuju Qi<sup>a</sup> and Ruokun Jia<sup>\*b</sup>

<sup>a</sup> College of Biomedical Engineering, Jilin Medical University, Jilin 132013, China

<sup>b</sup> College of Chemical Engineering, Northeast Electric Power University, Jilin 132012, China

E-mail: 1192603531@qq.com (Xiaohang Yang); yxh4035@163.com (Ruokun Jia)

**Table S1.** Surface areas and pore volumes of bulk CN and N-CN photocatalysts.

| Photocatalys | BET surface area (m <sup>2</sup> /g) | pore volume (cm <sup>3</sup> ·g <sup>-1</sup> ) |
|--------------|--------------------------------------|-------------------------------------------------|
| t            |                                      |                                                 |
| CN           | 6.69                                 | 0.09                                            |
| N-CN         | 33.33                                | 0.12                                            |

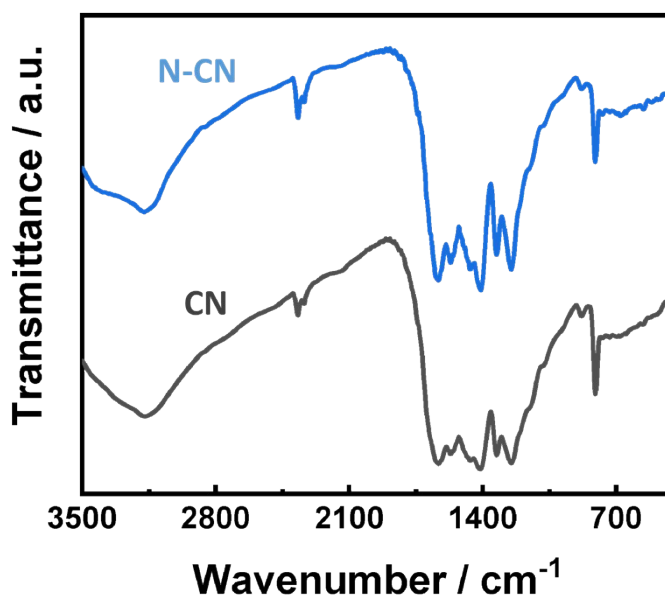

**Fig S1.** FTIR spectra of bulk CN and N-CN photocatalysts.

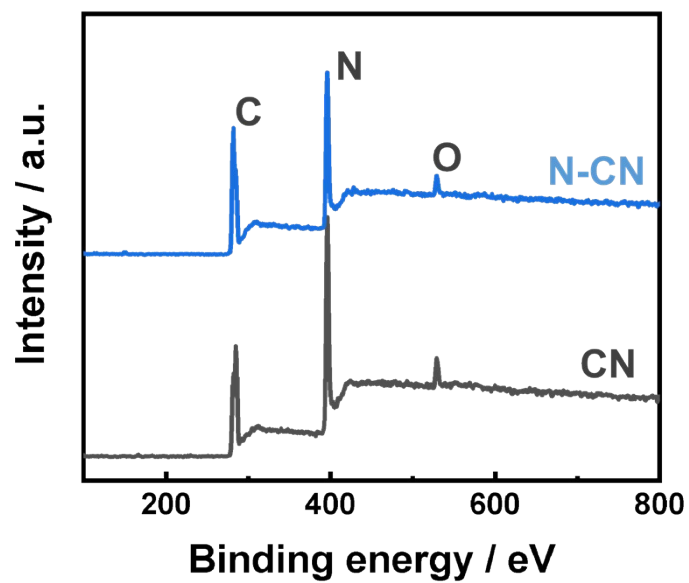

**Fig S2.** Survey XPS spectra of bulk CN and N-CN photocatalysts.

**Table S2.** Room temperature transient fluorescence decay of bulk CN and N-CN photocatalysts.

| Photocatalyst | Lifetime (ns) |          |          | Intensity (%) |       |       | A $\tau$ (ns) |
|---------------|---------------|----------|----------|---------------|-------|-------|---------------|
|               | $\tau_1$      | $\tau_2$ | $\tau_3$ | $I_1$         | $I_2$ | $I_3$ |               |
| CN            | 10.87         | 88.96    | 2.65     | 46.03         | 10.77 | 43.20 | 4.8434        |
| N-CN          | 2.63          | 11.53    | 85.87    | 45.77         | 39.91 | 14.32 | 4.7649        |
